# Supplementary material for: Repetitive Cerulein-Induced Chronic Pancreatitis in Growing Pigs—A Pilot Study
Source: MDPI journal article supplement (doi:10.3390/ijms24097715), 2023-04-23
Supplement: s1 [file s1]

# Repetitive Cerulein-Induced Chronic Pancreatitis in Growing Pigs – A Pilot Study

Ewa Tomaszewska, Małgorzata Świątkiewicz, Siemowit Muszyński, Janine Donaldson, Katarzyna Ropka-Molik, Marcin B. Arciszewski, Maciej Murawski, Tomasz Schwarz, Piotr Dobrowolski, Sylwia Szymańczyk, Sławomir Dresler, Joanna Bonior

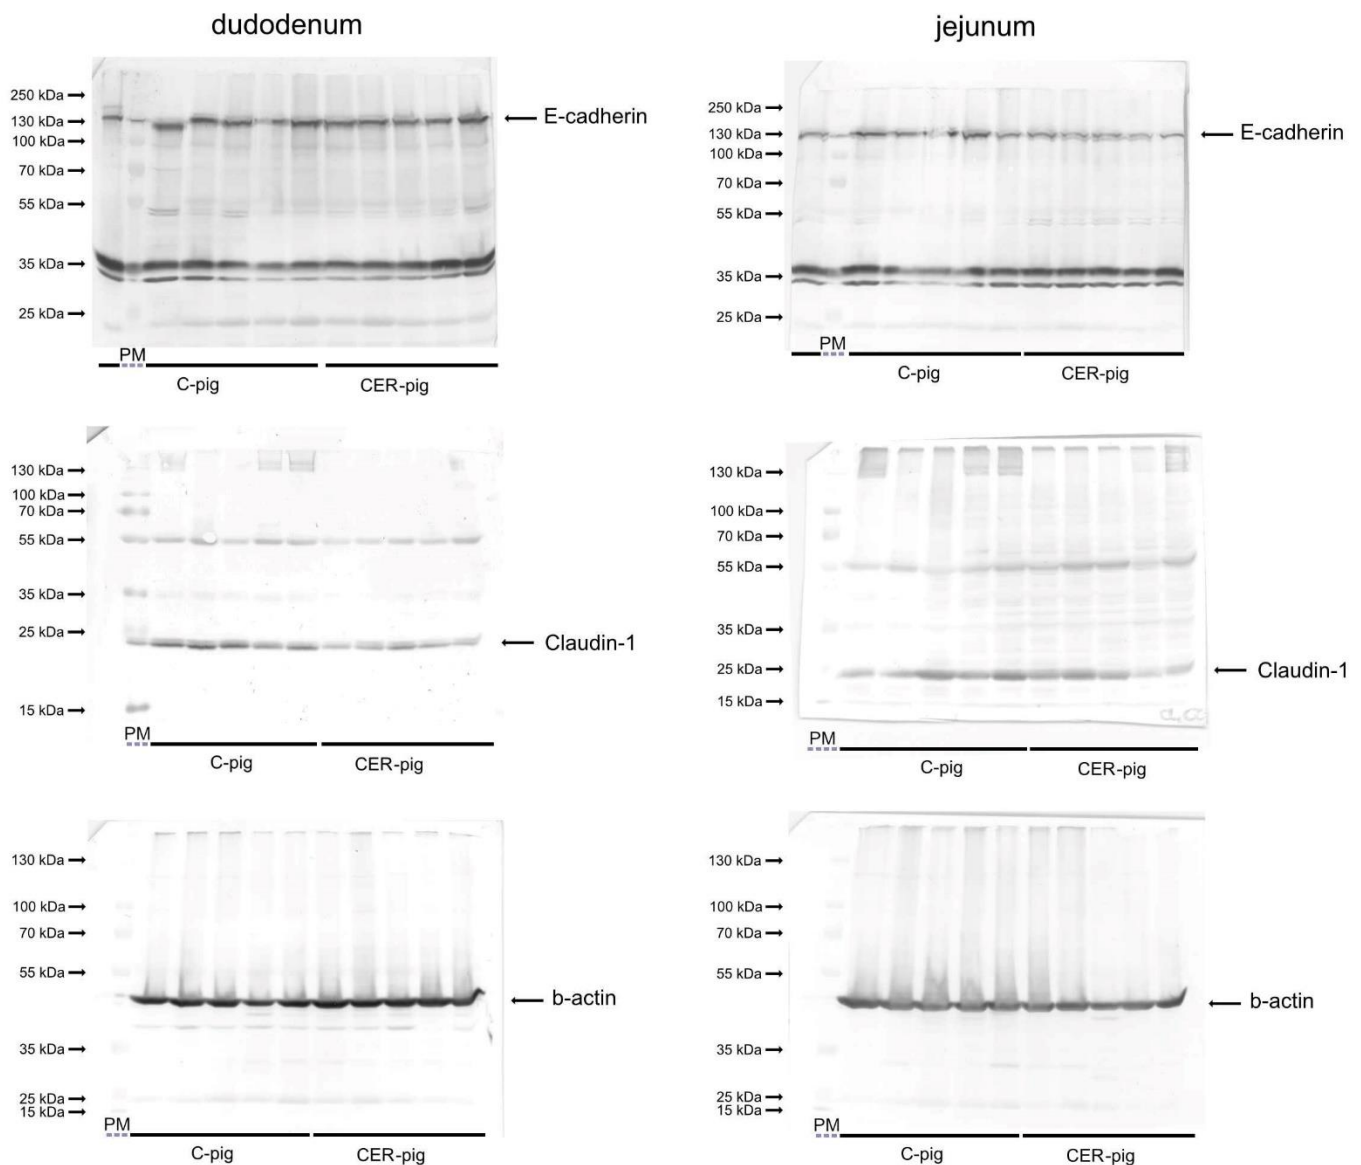

**Supplementary Figure S1.** Uncropped original Western blot membranes of E-Cadherin and Claudin-1 and b-actin as loading control (corresponding to Figure 7b and 7e in the main article).
